# Supplementary material
Source: MDPI journal article supplement (https://www.mdpi.com/2227-9040/11/2/85)
Supplement: s1 [file s1]

|            |      |                           |      |      |      |      |      |      |      |      |      |      |      |      |      |      |      |      |      |      |      |
|------------|------|---------------------------|------|------|------|------|------|------|------|------|------|------|------|------|------|------|------|------|------|------|------|
| 4747-07-3  | 7.7  | 1-Methoxyhexane           | 1.4  | 1.1  | 1.0  | 1.0  | 1.5  | 1.1  | 1.1  | 1.8  | 1.4  | 1.2  | 1.2  | 1.4  | 1.2  | 1.1  | 1.5  | 1.6  | 0.9  | 1.1  | 1.4  |
| 70220-06-3 | 7.9  | (Z)-1-Methoxyhex-3-ene    | 1.7  | 1.6  | 1.6  | 1.5  | 2.0  | 1.4  | 1.6  | 1.8  | 2.1  | 1.7  | 1.3  | 1.6  | 1.3  | 1.5  | 2.4  | 2.2  | 1.4  | 2.0  | 2.0  |
|            |      | TOTAL                     | 3.1  | 2.7  | 2.6  | 2.5  | 3.5  | 2.5  | 2.7  | 3.6  | 3.4  | 2.9  | 2.5  | 3.0  | 2.6  | 2.6  | 4.0  | 3.8  | 2.4  | 3.1  | 3.4  |
|            |      | <b>Esters</b>             |      |      |      |      |      |      |      |      |      |      |      |      |      |      |      |      |      |      |      |
| 3681-71-8  | 17.1 | (Z)-3-Hexen-1-ol, acetate | 17.4 | 20.4 | 18.0 | 17.9 | 20.8 | 19.5 | 17.0 | 23.6 | 22.4 | 18.6 | 17.7 | 22.8 | 24.0 | 17.4 | 21.4 | 25.2 | 10.4 | 15.9 | 22.7 |
| 142-92-7   | 17.5 | Acetic acid, hexyl ester  | 3.2  | 3.6  | 3.3  | 3.0  | 3.3  | 3.6  | 3.1  | 3.7  | 4.0  | 3.8  | 2.9  | 4.0  | 3.6  | 2.2  | 3.0  | 3.6  | 2.2  | 2.1  | 3.5  |
| 123-86-4   | 20.0 | Butyl-acetate             | 1.0  | 1.1  | 1.0  | 0.7  | 3.1  | 2.5  | 3.1  | 2.7  | 2.6  | 3.6  | 2.1  | 2.9  | 2.4  | 1.6  | 2.6  | 2.5  | 1.3  | 1.9  | 3.0  |
|            |      | TOTAL                     | 21.7 | 25.0 | 22.2 | 21.6 | 27.2 | 25.5 | 23.3 | 30.0 | 29.0 | 25.9 | 22.8 | 29.7 | 30.0 | 21.3 | 27.1 | 31.3 | 13.8 | 19.9 | 29.2 |
|            |      | <b>Carboxylic acids</b>   |      |      |      |      |      |      |      |      |      |      |      |      |      |      |      |      |      |      |      |
| 64-19-7    | 2.3  | Acetic acid               | n.d. | 5.6  | 4.2  | n.d. | 7.0  | 5.3  | 0.4  |
|            |      | TOTAL                     | n.d. | 5.6  | 4.2  | n.d. | 7.0  | 5.3  | 0.4  |
|            |      | <b>Ketones</b>            |      |      |      |      |      |      |      |      |      |      |      |      |      |      |      |      |      |      |      |
| 110-93-0   | 16.0 | 6-Methyl-5-hepten-2-one   | 2.2  | 2.3  | 1.7  | 1.7  | 2.3  | 1.7  | 1.9  | 1.6  | 1.3  | 1.3  | 0.9  | 1.2  | 1.6  | 1.0  | 1.4  | 1.6  | 0.4  | 0.8  | 1.6  |
| 689-67-8   | 38.0 | Geranylacetone            | 2.6  | 2.8  | 2.1  | 2.1  | 2.7  | 2.0  | 2.3  | 2.0  | 1.5  | 1.6  | 1.1  | 1.5  | 1.9  | 1.1  | 1.7  | 1.9  | 0.5  | 1.0  | 1.9  |
|            |      | TOTAL                     | 4.9  | 5.1  | 3.8  | 3.8  | 5.0  | 3.7  | 4.2  | 3.6  | 2.8  | 2.8  | 2.0  | 2.7  | 3.4  | 2.1  | 3.1  | 3.5  | 0.9  | 1.8  | 3.4  |

OC: opaque crystal; OP: opaque plastic; and C: metallic can. t0-t6: samples during the storage time. n.d.: not detected.
